# Supplementary material
Source: Springer Nature journal article supplement (https://www.springermedizin.de/resource/supplementary/12943_2011_933_MOESM5_ESM.pdf/9551706)

**A.****MCF10A**

|                  |   |   |   |    |
|------------------|---|---|---|----|
| IGF-I (2.6 nM)   | - | + | + | +  |
| U0126 ( $\mu$ M) | - | - | 5 | 10 |

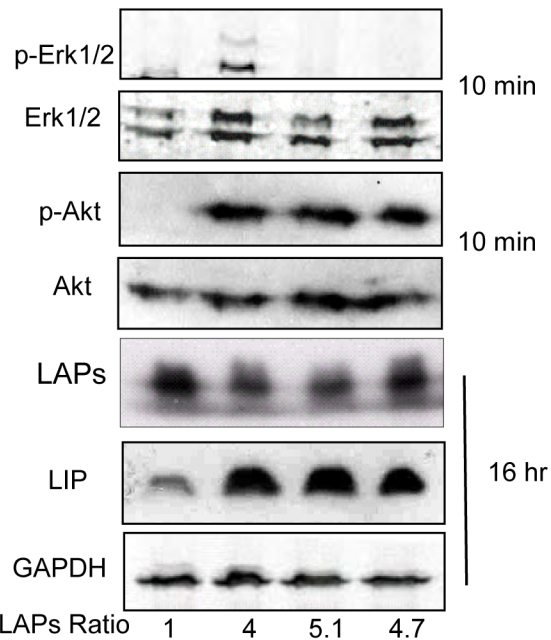**B.****MCF10A**

|                 |   |   |   |   |
|-----------------|---|---|---|---|
| IGF-I (2.6 nM)  | - | + | + | + |
| SH-6 ( $\mu$ M) | - | - | 1 | 5 |

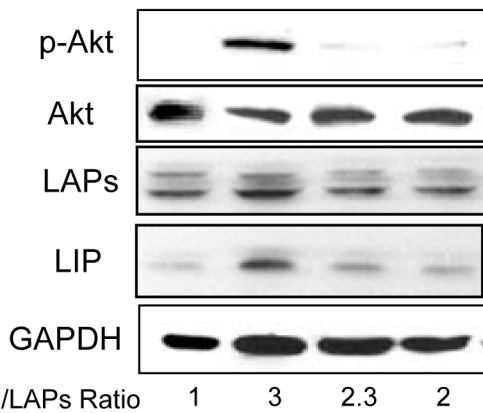**C.****MCF 7**

|                 |   |   |   |   |
|-----------------|---|---|---|---|
| IGF-I (2.6 nM)  | - | + | + | + |
| SH-6 ( $\mu$ M) | - | - | 1 | 5 |

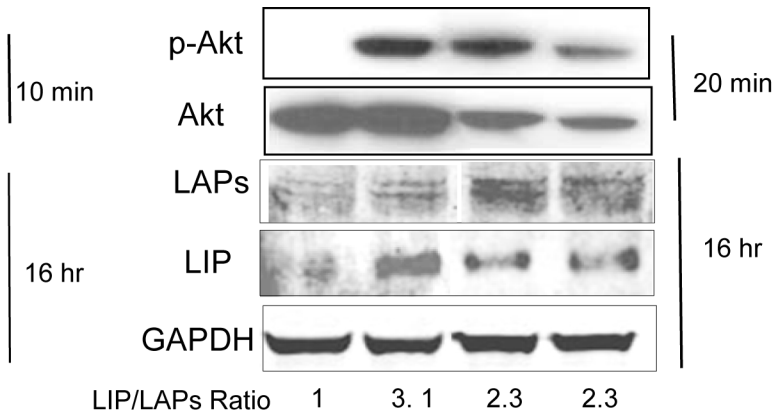

Supplement: MOESM5 [file 9551706]
